# Supplementary material
Source: Elsevier journal article supplement (https://www.sciencedirect.com/science/article/pii/S1413355519306185)
Supplement: mmc1 [file S1413355519306185:mmc1.docx]

Supplemental material. Text recommended for the survey advertising.

Text used in the UK

The University of Warwick is carrying out a survey about physiotherapy on breast reconstruction in the UK. If you have 10 minutes to help us with your experience, please access the survey using here: https://bit.ly/2NOkjxQ

This research is run by the University of Warwick

Text used in Brazil

Gostaríamos de convidá-lo para participar da pesquisa “Fisioterapia após reconstrução mamária para pacientes com câncer de mama”, vinculada ao Departamento de Tocoginecologia da Universidade Estadual de Campina, Brasil e Universidade de Warwick, Reino Unido. O objetivo deste projeto é conhecer os protocolos que fisioterapeutas brasileiros e britânicos utilizam com pacientes de reconstrução mamária.

Sua participação contribuirá para a prática da fisioterapia baseada em evidência. Solicitamos que responda ao questionário disponível em: <https://bit.ly/2NOkjxQ>
